# Supplementary material
Source: publisher figshare collection journal article supplement (https://asha.figshare.com/ndownloader/files/34076426)
Supplement: Supplementary file 1 [file 34076426]

## Sheet: ReadMe
Supplemental material, Storkel, "Minimal, Maximal, or Multiple: Which Contrastive Intervention Approach to Use With Children With Speech Sound Disorders?" LSHSS, https://doi.org/10.1044/2021_LSHSS-21-00105
Supplemental Material S3. Completed sound selection spreadsheet (i.e., Supplemental Material S1) for Ethan (5 years; 11 months, boy, severe speech sound disorder).
This case accompanies Storkel's article Minimal, maximal, or multiple: Which contrastive intervention approach to use with different children with speech sound disorders? Published in Language, Speech, and Hearing Services in Schools.
This is a hypothetical case. Hypothetical cases are based on real children. Specifically, children's parents gave consent for data to be deidentified and used for teaching and research purposes. Accuracy and error patterns generally are taken from real cases but then additional information was created based on the author's personal experience to enrich the case. Likewise, children's phonological …
Ethan is age 5;11 and was identified as male at birth.
His standard score on the Arizona-4 Articulation Test was </= 50, corresponding to a percentile rank of <0.1, corresponding to a severity rating of Severe
His standard score on the Arizona-4 Phonological Test was </=50, corresponding to a percentile rank of <0.1, corresponding to a severity rating of Severe
Additional testing showed poor language (i.e., Standard Score of 72, Percentile Rank of 3 on the Core Language Score on the Clinical Evaluation of Language Fundamentals-4) and borderline phonological awareness (i.e., Standard Score of 84, Percentile Rank of 14 on the Comprehensive Test of Phonological Processing-2)
The teacher reports that Ethan is easily frustrated and reticent to talk in class.
See text of article for summary of intervention options for Ethan.

## Sheet: Child_data
Accuracy Analysis		Onset#	Onset%	Coda#	Coda%	Total%	Onset Productions					Coda Productions					Majority Error Initial	Majority Error Final	Majority Subst Initial	Majority Subst Final
	k	2	0.4	0	0	0.2	k	t	t	k	t	t	t	t	t	t	Accurate	Substitution		t
	g	0	0	0	0	0	d	d	d	d	d	d	d	d	d	d	Substitution	Substitution	d	d
	f	5	1	5	1	1	f	f	f	f	f	f	f	f	f	f	Accurate	Accurate
	v	1	0.2	5	1	0.6	b	v	b	b	b	v	v	v	v	v	Accurate	Accurate
	T	0	0	0	0	0	t	t	t	t	t	t	f	s	del	ts	Substitution	Substitution	t	variable
	D	0	0	0	0	0	d	d	d	d	h	d	d	d	N/A	N/A	Substitution	Substitution	d	d
	s	5	1	5	1	1	s	s	s	s	s	s	s	s	s	s	Accurate	Accurate
	z	5	1	5	1	1	z	z	z	z	z	z	z	z	z	z	Accurate	Accurate
	S	0	0	0	0	0	s	s	s-pal	s	s	s-pal	s	s	s-pal	ts	Substitution	Substitution	s	s
	C	3	0.6	0	0	0.3	C	k	C	ts	C	ts	ts	ts	s	s	Accurate	Substitution		ts
	J	0	0	0	0	0	d	d	d	d	d	z	z	z	z	dz	Substitution	Substitution	d	z
	G	N/A	N/A	0	0	0	N/A	N/A	N/A	N/A	N/A	n	n	n	n	n		Substitution		n
	l	0	0	0	0	0	del	j	del	del	del	del	del	del	del	del	Deletion	Deletion	del	del
	r	0	0	0	0	0	w	w	w	w	w	del	del	del	del	del	Substitution	Deletion	w	del
	ALL	21	0.313433	20	0.294118	0.303704	67 opportunities					68 opportunities
Snd		#	%	Accuracy Analysis by Sound	Productions																		Majority Error
w-cluster		2	0.333333	kw, tw, sw	tw	tw	tw	tw	w	w													Other
l-cluster		0	0	kl, pl, bl, gl, fl, sl	t	t	p	p	bj	b	d	d	f	f	s	s							Reduction
r-cluster		0	0	kr, pr, tr, br, dr, gr, fr, Sr, Tr	t	t	p	p	t	t	b	b	d	d	d	d	f	f	s	s	t	t	Reduction
s-cluster		0	0	sw, sl, sm, sn, sk, sp, st	w	w	s	s	m	m	n	n	t	t	b	p	t	t					Reduction
3s		0	0	skw, spl, skr, spr, str	t	w	p	p	t	t	p	p	t	t									Reduction

## Sheet: Minimal
Calculations (Ignore)			Possible Targets in Initial Position	Substitute for Initial Position Pair	Possible Targets in Final Position	Substitute for Final Position Pair	Calculations (Ignore)			Are the substitutes English sounds? (If no, eliminate)	Are the substitutes consistent? (If no, eliminate)	List relevant child/family factors for or against this option	List relevant SLP/ expertise factors for or against this option	Is the child stimulable for the target? (intervention planning)	Can the child accurately perceive the target:substitute? (intervention planning)
0	0	0	0	0	k	t	1	1	2	yes	yes
1	1	2	g	d	g	d	1	1	2	yes	yes
0	0	0	0	0	0	0	0	0	0
1	0	1	0	0	0	0	0	0	0
1	1	2	T	t	T	variable	1	1	2	yes	yes-initial; no-final
1	1	2	D	d	D	d	1	1	2	yes	yes
0	0	0	0	0	0	0	0	0	0		yes
0	0	0	0	0	0	0	0	0	0
1	1	2	S	s	S	s	1	1	2	yes	yes
0	0	0	0	0	0	0	1	1
1	1	2	J	d	J	z	1	1	2	yes	yes
0	0	0	0	0	G	n	1	1	2	yes	yes
1	1	2	l	del	l	del	1	1	2	yes	yes
1	1	2	r	w	r	del	1	1	2	yes	yes
						Add Notes from Child Data				Are the substitutes English sounds? (If no, eliminate)	Are the substitutes consistent? (If no, eliminate)	List relevant child/family factors for or against this option	List relevant SLP/ expertise factors for or against this option	Is the child stimulable for the target? (intervention planning)	Can the child accurately perceive the target:substitute? (intervention planning)
0	0	0	0	0	0
1	1	2	l-cluster	kl, pl, bl, gl, fl, sl	Reduction	Many options				yes (but bj for bl)	yes
1	1	2	r-cluster	kr, pr, tr, br, dr, gr, fr, Sr, Tr	Reduction	Many options				yes	yes
1	1	2	s-cluster	sw, sl, sm, sn, sk, sp, st	Reduction	Many options				yes	yes
1	1	2	3s	skw, spl, skr, spr, str	Reduction	Many options				yes	yes

## Sheet: Maximal
Initial	l	r	List relevant child/family factors for or against options in this row (initial)	List relevant SLP/ expertise factors for or against options in this row (initial)	Final	ŋ	l	r	List relevant child/family factors for or against options in this row (final)	List relevant SLP/ expertise factors for or against options in this row (final)
k	0	0			k		yes	yes
g	yes	yes			g		yes	yes
f	0	0			f	0	0	0
v	0	0			v	0	0	0
θ		yes			θ	yes		yes
ð					ð
s	0	0			s	0	0	0
z		0			z	0		0
ʃ	yes				ʃ	yes	yes
ʧ	0	0			ʧ	yes	yes	yes
ʤ	yes				ʤ	yes	yes
Calculations (Ignore)
	Initial	Final	Initial	Final	Initial	Final
k	0	1	-1	0	-1	1
g	1	1	0	0	1	1
f	0	0	-1	-1	-1	-1
v	1	0	-1	-1	0	-1
θ	1	1	0	0	1	1
ð	1	1	0	0	1	1
s	0	0	-1	-1	-1	-1
z	0	0	-1	-1	-1	-1
ʃ	1	1	0	0	1	1
ʧ	0	1	-1	0	-1	1
ʤ	1	1	0	0	1	1
ŋ	0	1	-1	0	-1	1
l	1	1	0	0	1	1
r	1	1	0	0	1	1

## Sheet: Multiple
Possible Targets in Initial Position	Substitute for Initial Position Pair	Possible Targets in Final Position	Substitute for Final Position Pair		Step 2a: Enter substitutes with high number of targets here	Step 2b: list targets for each substitute here																					List relevant child/family factors for or against this option	List relevant SLP/ expertise factors for or against this option
0	0	k	t	initial	t	T	kl	kr	tr	Tr	sk	st	skr	str
g	d	g	d	initial	d	g	D	J	gl	dr	gr
0	0	0	0	initial
0	0	0	0	initial
T	t	T	variable	initial
D	d	D	d
0	0	0	0	final
0	0	0	0	final
S	s	S	s	final
0	0	0	0	final
J	d	J	z	final
0	0	G	n	Step 3: Selection of targets to pair with substitutes. Make notes about child/family and clinical/expertise factors in the columns to the right. In the space above, shade targets in grey if you don't intend to use them. Shade them in yellow if you want to consider selecting them. Change shading to green for final selection. Remember that you want to select a range of targets affected by the colla…
l	del	l	del
r	w	r	del
					Targets	Cluster productions -- All productions copied via formula
0		0			kw, tw, sw	tw	tw	tw	tw	w	w
l-cluster		Reduction			kl, pl, bl, gl, fl, sl	t	t	p	p	bj	b	d	d	f	f	s	s
r-cluster		Reduction			kr, pr, tr, br, dr, gr, fr, Sr, Tr	t	t	p	p	t	t	b	b	d	d	d	d	f	f	s	s	t	t
s-cluster		Reduction			sw, sl, sm, sn, sk, sp, st	w	w	s	s	m	m	n	n	t	t	b	p	t	t
3s		Reduction			skw, spl, skr, spr, str	t	w	p	p	t	t	p	p	t	t
Step 1
Enter initial position substitute here (one per row)	Formula calculates # of targets with this substitute in initial position (singletons & clusters)	Enter final position substitute here (one per row)	Formula calculates # of targets with this substitute in final position (singletons only)
t	18	t	1	t	T, kl, kr, tr, Tr, sk, st, skr, str
d	9	d	2	d	g, D, J, gl, dr, gr
w	6	del	2	w	r, sw,
	7		5
	7		5
	7		5
	7		5
	7		5
	7		5
	7		5
	7		5
	7		5
	7		5
	7		5
	7		5
	7		5
	7		5
	7		5
	7		5
